# Supplementary material for: High performance chemiresistive H2S sensors using Ag-loaded SnO2 yolk–shell nanostructures
Source: Royal Society of Chemistry journal article supplement (doi:10.1039/c4ra01364f), 2014-01-01
Supplement: c4ra01364f1.pdf [file c4ra01364f1.pdf]

### Supporting Information for

## High performance chemiresistive H<sub>2</sub>S sensors using Ag-loaded SnO<sub>2</sub> yolk-shell nanostructures.

*Ji-Wook Yoon,<sup>a</sup> Young Jun Hong,<sup>b</sup> Yun Chan Kang,<sup>b</sup> and Jong-Heun Lee<sup>\*,a</sup>*

<sup>a</sup>Department of Materials Science and Engineering, Korea University, Anam-Dong, Seongbuk-Gu, Seoul 136-713, Republic of Korea

<sup>b</sup>Department of Chemical Engineering, Konkuk University, 1 Hwayang-dong, Gwangjin-gu, Seoul 143-701, Republic of Korea

\*Email: jongheun@korea.ac.kr

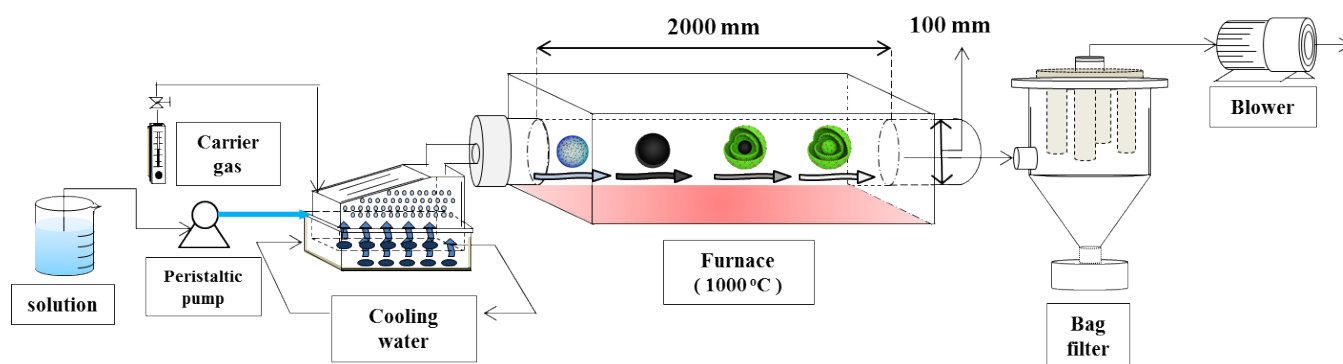

**Fig. S1** Schematic diagram of the large scale ultrasonic spray pyrolysis process.

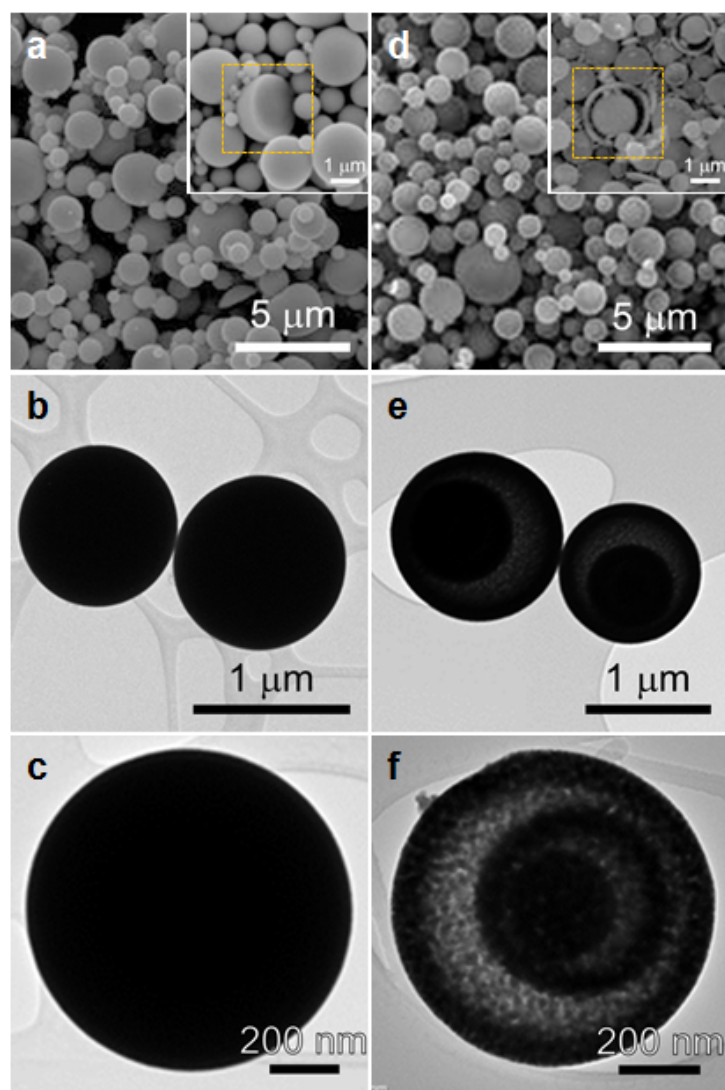

**Fig. S2** SEM and TEM images of (a-c) SnO<sub>2</sub> spheres with dense inner structures (D-SnO<sub>2</sub>) and (d-f) pure SnO<sub>2</sub> yolk-shell spheres (YS-SnO<sub>2</sub>).

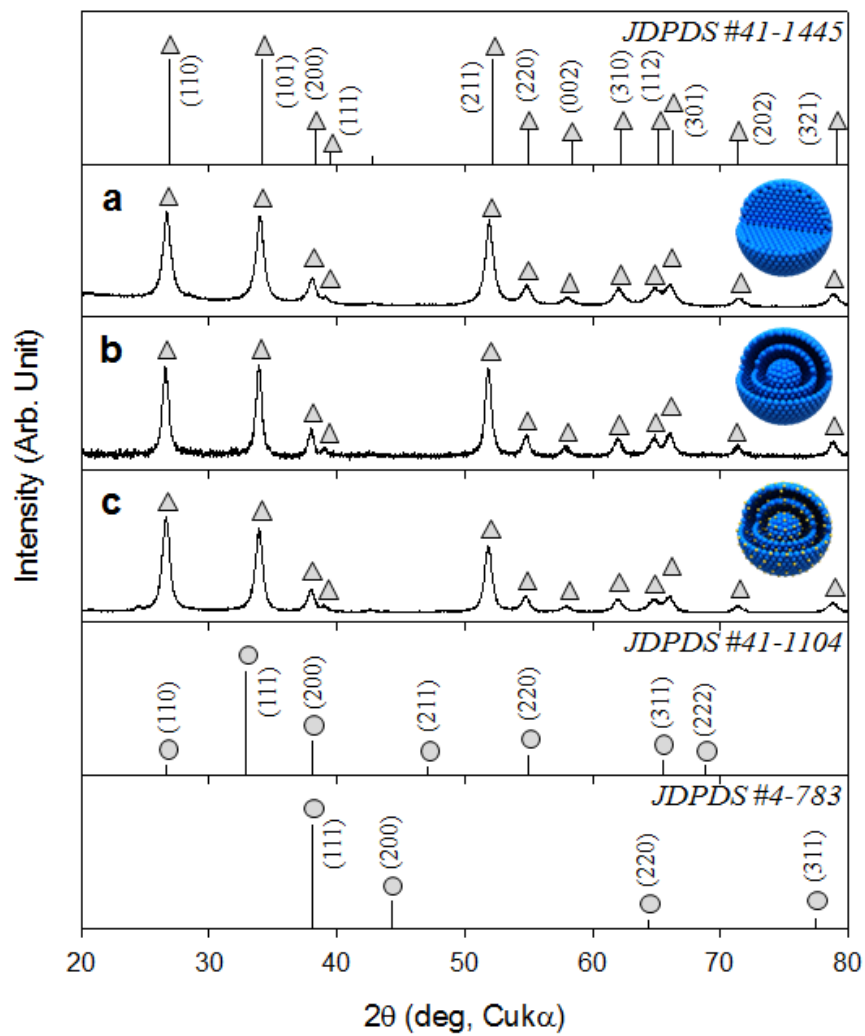

**Fig. S3** X-ray diffraction patterns of (a) D-SnO<sub>2</sub>, (b) YS-SnO<sub>2</sub>, and (c) Ag-YS-SnO<sub>2</sub> spheres.

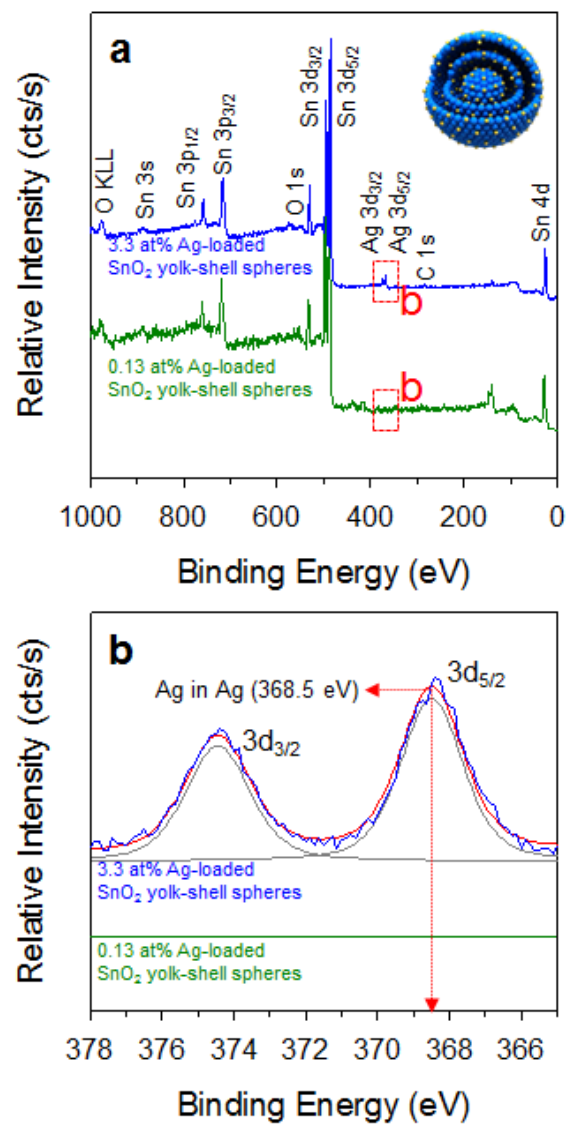

**Fig. S4** X-ray photoelectron spectroscopy results of SnO<sub>2</sub> yolk-shell spheres loaded with 0.13 and 3.3 at% Ag: (a) full range spectra and (b) 3d<sub>3/2</sub> and 3d<sub>5/2</sub> peaks.

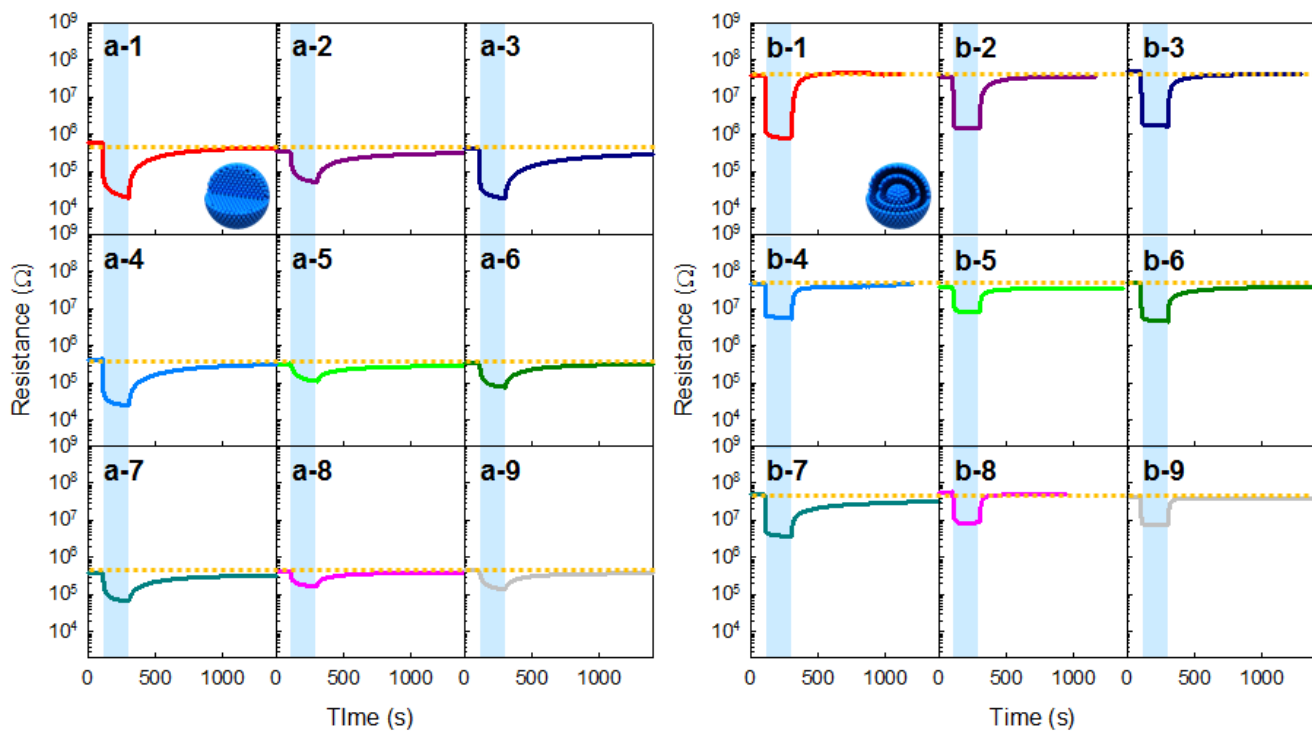

**Fig. S5** Dynamic sensing transients to 5 ppm interference gases at 350°C: (a) D-SnO<sub>2</sub> spheres, (b) YS-SnO<sub>2</sub> spheres (a,b-1: C<sub>2</sub>H<sub>5</sub>OH; a,b-2: HCHO; a,b-3: trimethylamine; a,b-4: NH<sub>3</sub>; a,b-5: benzene; a,b-6: toluene; a,b-7: o-xylene; a,b-8: H<sub>2</sub>; a,b-9: CO).
